# Supplementary material for: Associations between (pharmaco-)genetic markers and postoperative pain after inguinal hernia repair – a prospective study protocol
Source: PubMed Central journal article supplement — BMC Med Genomics. 2024 Dec 18;17:286. doi: 10.1186/s12920-024-02064-6 (PMC11658386; doi:10.1186/s12920-024-02064-6), 2024-12-18
Supplement: 12920_2024_2064_MOESM1_ESM.pdf [file 12920_2024_2064_MOESM1_ESM.pdf]

Additional file 1: EuraHS QOL Score

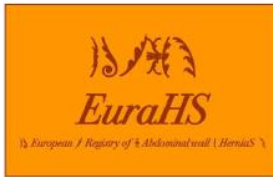

*EuraHS QoL*

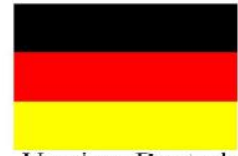

Version: Deutsch

**EuraHS Quality Of Life**

**Fragebogen**

**Präoperativ**

| 1. Schmerzen im Bereich der Hernie                                                  |                       |   |   |   |   |                               |   |   |   |   |    |   |
|-------------------------------------------------------------------------------------|-----------------------|---|---|---|---|-------------------------------|---|---|---|---|----|---|
|                                                                                     | 0 = kein Schmerz      |   |   |   |   | 10 = sehr starker Schmerz     |   |   |   |   |    |   |
| <b>Im Ruhezustand</b><br>(im Liegen)                                                | 0                     | 1 | 2 | 3 | 4 | 5                             | 6 | 7 | 8 | 9 | 10 |   |
| <b>Bei Aktivitäten</b><br>(Wandern, Rad fahren, Sport allgemein)                    | 0                     | 1 | 2 | 3 | 4 | 5                             | 6 | 7 | 8 | 9 | 10 |   |
| <b>Schlimmster gefühlter Schmerz in der vergangenen Woche</b>                       | 0                     | 1 | 2 | 3 | 4 | 5                             | 6 | 7 | 8 | 9 | 10 |   |
| 2. Behinderungen bei Aktivitäten durch Schmerz oder Unbehagen im Bereich der Hernie |                       |   |   |   |   |                               |   |   |   |   |    |   |
|                                                                                     | 0 = keine Behinderung |   |   |   |   | 10 = vollständige Behinderung |   |   |   |   |    |   |
| <b>Bei täglichen Aktivitäten (zu Hause)</b>                                         | 0                     | 1 | 2 | 3 | 4 | 5                             | 6 | 7 | 8 | 9 | 10 | X |
| <b>Außerhalb des Hauses</b><br>(Wandern, Rad fahren, Auto fahren)                   | 0                     | 1 | 2 | 3 | 4 | 5                             | 6 | 7 | 8 | 9 | 10 | X |
| <b>Beim Sport</b>                                                                   | 0                     | 1 | 2 | 3 | 4 | 5                             | 6 | 7 | 8 | 9 | 10 | X |
| <b>Bei schwerer körperlicher Arbeit oder Anstrengung</b>                            | 0                     | 1 | 2 | 3 | 4 | 5                             | 6 | 7 | 8 | 9 | 10 | X |
| X = im Falle, dass Sie die Aktivitäten nicht ausführen                              |                       |   |   |   |   |                               |   |   |   |   |    |   |
| 3. Kosmetisches Empfinden                                                           |                       |   |   |   |   |                               |   |   |   |   |    |   |
|                                                                                     | 0 = sehr schön        |   |   |   |   | 10 = extrem hässlich          |   |   |   |   |    |   |
| <b>Form Ihres Bauches insgesamt</b>                                                 | 0                     | 1 | 2 | 3 | 4 | 5                             | 6 | 7 | 8 | 9 | 10 |   |
| <b>Stelle der Hernie</b>                                                            | 0                     | 1 | 2 | 3 | 4 | 5                             | 6 | 7 | 8 | 9 | 10 |   |

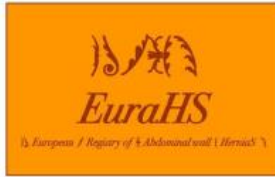

# EuraHS QoL

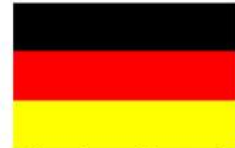

Version: Deutsch

## EuraHS Quality Of Life Fragebogen    postoperativ    \_\_\_\_\_ W/M

| <b>1. Schmerzen an der Stelle der Hernienoperation</b>                                                  |                                                        |   |   |   |   |                               |   |   |   |   |    |   |
|---------------------------------------------------------------------------------------------------------|--------------------------------------------------------|---|---|---|---|-------------------------------|---|---|---|---|----|---|
|                                                                                                         | 0 = kein Schmerz                                       |   |   |   |   | 10 = sehr starker Schmerz     |   |   |   |   |    |   |
| <b>Im Ruhezustand</b><br>(im Liegen)                                                                    | 0                                                      | 1 | 2 | 3 | 4 | 5                             | 6 | 7 | 8 | 9 | 10 |   |
| <b>Bei Aktivitäten</b><br>(Wandern, Rad fahren, Sport allgemein)                                        | 0                                                      | 1 | 2 | 3 | 4 | 5                             | 6 | 7 | 8 | 9 | 10 |   |
| <b>Schlimmster gefühlter Schmerz in der vergangenen Woche</b>                                           | 0                                                      | 1 | 2 | 3 | 4 | 5                             | 6 | 7 | 8 | 9 | 10 |   |
| <b>2. Behinderungen bei Aktivitäten durch Schmerz oder Unbehagen an der Stelle der Hernienoperation</b> |                                                        |   |   |   |   |                               |   |   |   |   |    |   |
|                                                                                                         | 0 = keine Behinderung                                  |   |   |   |   | 10 = vollständige Behinderung |   |   |   |   |    |   |
| <b>Bei täglichen Aktivitäten (zu Hause)</b>                                                             | 0                                                      | 1 | 2 | 3 | 4 | 5                             | 6 | 7 | 8 | 9 | 10 | X |
| <b>Außerhalb des Hauses</b><br>(Wandern, Rad fahren, Auto fahren)                                       | 0                                                      | 1 | 2 | 3 | 4 | 5                             | 6 | 7 | 8 | 9 | 10 | X |
| <b>Beim Sport</b>                                                                                       | 0                                                      | 1 | 2 | 3 | 4 | 5                             | 6 | 7 | 8 | 9 | 10 | X |
| <b>Bei schwerer körperlicher Arbeit oder Anstrengung</b>                                                | 0                                                      | 1 | 2 | 3 | 4 | 5                             | 6 | 7 | 8 | 9 | 10 | X |
|                                                                                                         | X = im Falle, dass Sie die Aktivitäten nicht ausführen |   |   |   |   |                               |   |   |   |   |    |   |
| <b>3. Kosmetisches Empfinden</b>                                                                        |                                                        |   |   |   |   |                               |   |   |   |   |    |   |
|                                                                                                         | 0 = sehr schön                                         |   |   |   |   | 10 = extrem hässlich          |   |   |   |   |    |   |
| <b>Form Ihres Bauches insgesamt</b>                                                                     | 0                                                      | 1 | 2 | 3 | 4 | 5                             | 6 | 7 | 8 | 9 | 10 |   |
| <b>Stelle der Hernie und der Narbe</b>                                                                  | 0                                                      | 1 | 2 | 3 | 4 | 5                             | 6 | 7 | 8 | 9 | 10 |   |
