# Supplementary material for: Associations between (pharmaco-)genetic markers and postoperative pain after inguinal hernia repair – a prospective study protocol
Source: PubMed Central journal article supplement — BMC Med Genomics. 2024 Dec 18;17:286. doi: 10.1186/s12920-024-02064-6 (PMC11658386; doi:10.1186/s12920-024-02064-6), 2024-12-18
Supplement: 12920_2024_2064_MOESM2_ESM.pdf [file 12920_2024_2064_MOESM2_ESM.pdf]

## Additional file 2: Schedule of assessments

| Date of consultation                     |      | 27.12.2023 | 28.12.2023 | 10.01.2024 | 24.01.2024 | 07.02.2024 |
|------------------------------------------|------|------------|------------|------------|------------|------------|
| Day                                      | > -1 | 0          | 1          | 14         | 28         | 42         |
| Preoperative surgical consultation       | x    |            |            |            |            |            |
| Eligibility                              | x    |            |            |            |            |            |
| Infomred consent for trial participation | x    |            |            |            |            |            |
| EuraHS-QOL preoperatively                | x    |            |            |            |            |            |
| Buccal swab (Stratipharm®)               | x    |            |            |            |            |            |
| Preoperative anesthesia consultation     |      | x          |            |            |            |            |
| Blood sample collection                  |      | x          |            |            |            |            |
| Operation                                |      |            | x          |            |            |            |
| NRS                                      |      |            |            | x*         |            |            |
| EuraHS-QOL postoperatively               |      |            |            |            | x*         | x*         |
| Medication documentation                 |      | x          | x          | x*         | x*         | x*         |
| Postoperative surgical consultation      |      |            |            |            |            | x          |

\* Assessment by email consultation or paper based diary
