# Supplementary material for: Associations between (pharmaco-)genetic markers and postoperative pain after inguinal hernia repair – a prospective study protocol
Source: PubMed Central journal article supplement — BMC Med Genomics. 2024 Dec 18;17:286. doi: 10.1186/s12920-024-02064-6 (PMC11658386; doi:10.1186/s12920-024-02064-6), 2024-12-18
Supplement: 12920_2024_2064_MOESM3_ESM.pdf [file 12920_2024_2064_MOESM3_ESM.pdf]

### Additional file 3: Stratipharm® SNPs and annotation

| <i>Gen</i> | <i>Chromosom / mitochondriale DNA</i> | <i>Annotation</i> | <i>Pos-Info</i>            | <i>AS-Austausch</i> | <i>Basen</i> |
|------------|---------------------------------------|-------------------|----------------------------|---------------------|--------------|
| ABCB1      | Chromosom 7q21.12                     | rs1045642         | NM_000927.4:c.3435T>C      | I1145I              | T>C          |
| ABCB1      | Chromosom 7q21.12                     | rs1128503         | NM_000927.4:c.1236T>C      | G412G               | T>C          |
| ABCB1      | Chromosom 7q21.12                     | rs2032582         | NM_000927.4:c.2677G>A      | A893T               | G>A          |
| ABCB1      | Chromosom 7q21.12                     | rs2032582         | NM_000927.4:c.2677G>T      | A893S               | G>T          |
| ABCB1      | Chromosom 7q21.12                     | rs2032583         | NM_000927.4:c.2685+49T>C   | -                   | T>C          |
| ABCG2      | Chromosom 4q22-q23                    | rs2231142         | NM_004827.2:c.421C>A       | Q141K               | C>A          |
| ABCG2      | Chromosom 4q22-q23                    | rs13120400        | NM_004827.2:c.1194+928A>G  | -                   | A>G          |
| ABCG2      | Chromosom 4q22-q23                    | rs17731538        | NC_000004.11:g.89055379G>A | -                   | G>A          |
| ADRB1      | Chromosom 10q24-q26                   | rs1801252         | NM_000684.2:c.145A>G       | S49G                | A>G          |
| ADRB1      | Chromosom 10q24-q26                   | rs1801253         | NM_000684.2:c.1165G>C      | G389R               | G>C          |
| ADRB2      | Chromosom 5q31-q32                    | rs1042713         | NT_029289.11:g.9369367G>A  | G16R                | G>A          |
| ADRB2      | Chromosom 5q31-q32                    | rs1042714         | NC_000005.9:g.148206473G>C | E27Q                | G>C          |
| COMT       | Chromosom 22q11.21                    | rs4680            | NM_000754.3:c.472G>A       | V158M               | G>A          |
| COMT       | Chromosom 22q11.21                    | rs165599          | NM_000754.3:c.*522G>A      | -                   | G>A          |
| COMT       | Chromosom 22q11.21                    | rs4646316         | NM_000754.3:c.615+310C>T   | -                   | C>T          |
| COMT       | Chromosom 22q11.21                    | rs9332377         | NM_000754.3:c.616-367C>T   | -                   | C>T          |
| COQ2       | Chromosom 4q21.23                     | rs4693075         | NC_000004.11:g.84192168G>C | -                   | G>C          |
| COQ2       | Chromosom 4q21.23                     | rs6535454         | NM_015697.7:c.894T>C       | D298D               | T>C          |
| CYP1A2     | Chromosom 15q24.1                     | rs2069514         | NC_000015.9:g.75038220G>A  | -                   | G>A          |
| CYP1A2     | Chromosom 15q24.1                     | rs762551          | NC_000015.9:g.75041917C>A  | -                   | C>A          |
| CYP2B6     | Chromosom 19q13.2                     | rs8192709         | NM_000767.4:c.64C>T        | R22C                | C>T          |
| CYP2B6     | Chromosom 19q13.2                     | rs28399499        | NM_000767.4:c.983T>C       | I328T               | T>C          |
| CYP2B6     | Chromosom 19q13.2                     | rs3745274         | NM_000767.4:c.516G>T       | Q172H               | G>T          |
| CYP2C8     | Chromosom 10q24.1                     | rs10509681        | NM_000770.3:c.1196A>G      | K399R               | A>G          |
| CYP2C8     | Chromosom 10q24.1                     | rs11572080        | NM_000770.3:c.416G>A       | R139K               | G>A          |
| CYP2C8     | Chromosom 10q24.1                     | rs1934951         | NG_007972.1:g.35707G>A     | -                   | G>A          |
| CYP2C9     | Chromosom 10q24.1                     | rs1799853         | NM_000771.3:c.430C>T       | R144C               | C>T          |
| CYP2C9     | Chromosom 10q24.1                     | rs1057910         | NM_000771.3:c.1075A>C      | I359L               | A>C          |
| CYP2C9     | Chromosom 10q24.1                     | rs9332131         | NM_000771.3:c.817delA      | K273X               | delA         |
| CYP2C9     | Chromosom 10q24.1                     | rs7900194         | NM_000771.3:c.449G>A       | R150H               | G>A          |
| CYP2C9     | Chromosom 10q24.1                     | rs28371685        | NM_000771.3:c.1003C>T      | R335W               | C>T          |
| CYP2C19    | Chromosom 10q24                       | rs4244285         | NM_000769.1:c.681G>A       | -                   | G>A          |
| CYP2C19    | Chromosom 10q24                       | rs4986893         | NM_000769.1:c.636G>A       | W212X               | G>A          |
| CYP2C19    | Chromosom 10q24                       | rs12248560        | NG_008384.1:g.4195C>T      | -                   | C>T          |

|                |                      |                    |                              |         |             |
|----------------|----------------------|--------------------|------------------------------|---------|-------------|
| <b>CYP2C19</b> | Chromosom 10q24      | <b>rs28399504</b>  | NM_000769.1:c.1A>G           | M1V     | A>G         |
| <b>CYP2D6</b>  | Chromosom 22q13.1    | -                  | copy number variation        | -       | CNV         |
| <b>CYP2D6</b>  | Chromosom 22q13.1    | <b>rs35742686</b>  | NM_000106.4:c.775delA        | -       | delA        |
| <b>CYP2D6</b>  | Chromosom 22q13.1    | <b>rs3892097</b>   | NM_000106.4:c.506-1G>A       | -       | G>A         |
| <b>CYP2D6</b>  | Chromosom 22q13.1    | <b>rs5030655</b>   | NM_000106.4:c.454delT        | -       | delT        |
| <b>CYP2D6</b>  | Chromosom 22q13.1    | <b>rs5030867</b>   | NM_000106.4:c.971A>C         | H324P   | A>C         |
| <b>CYP2D6</b>  | Chromosom 22q13.1    | <b>rs5030865</b>   | NM_000106.4:c.505G>T         | G169X   | G>T         |
| <b>CYP2D6</b>  | Chromosom 22q13.1    | <b>rs5030865</b>   | NM_000106.4:c.505G>A         | G169R   | G>A         |
| <b>CYP2D6</b>  | Chromosom 22q13.1    | <b>rs5030656</b>   | NM_000106.5:c.841_843delAAG  | K281del | delAAG      |
| <b>CYP2D6</b>  | Chromosom 22q13.1    | <b>rs1065852</b>   | NM_000106.4:c.100C>T         | P34S    | C>T         |
| <b>CYP2D6</b>  | Chromosom 22q13.1    | <b>rs201377835</b> | NM_000106.5:c.181-1G>C       | -       | G>C         |
| <b>CYP2D6</b>  | Chromosom 22q13.1    | <b>rs28371706</b>  | NM_000106.4:c.320C>T         | T107I   | C>T         |
| <b>CYP2D6</b>  | Chromosom 22q13.1    | <b>rs59421388</b>  | NM_000106.4:c.1012G>A        | V338M   | G>A         |
| <b>CYP2D6</b>  | Chromosom 22q13.1    | <b>rs28371725</b>  | NM_000106.4:c.985+39G>A      | -       | G>A         |
| <b>CYP3A4</b>  | Chromosom 7q21.1     | <b>rs2740574</b>   | NG_000004.3:g.135607G>A      | -       | G>A         |
| <b>CYP3A4</b>  | Chromosom 7q21.1     | <b>rs2242480</b>   | NM_017460.5:c.1026+12G>A     | -       | G>A         |
| <b>CYP3A5</b>  | Chromosom 7q21.1     | <b>rs776746</b>    | NM_000777.3:c.219-237G>A     | -       | G>A         |
| <b>DPYD</b>    | Chromosom 1p22       | <b>rs3918290</b>   | NM_000110.3:c.1905+1G>A      | -       | G>A         |
| <b>DPYD</b>    | Chromosom 1p22       | <b>rs72549303</b>  | NM_000110.3:c.1898delC       | -       | delC        |
| <b>DPYD</b>    | Chromosom 1p22       | <b>rs72549309</b>  | NM_000110.3:c.298delTinsTCAT | -       | delTinsTCAT |
| <b>DPYD</b>    | Chromosom 1p22       | <b>rs55886062</b>  | NM_000110.3:c.1679T>G        | I560S   | T>G         |
| <b>DPYD</b>    | Chromosom 1p22       | <b>rs67376798</b>  | NM_000110.3:c.2846A>T        | D949V   | A>T         |
| <b>DPYD</b>    | Chromosom 1p22       | <b>rs2297595</b>   | NM_000110.3:c.496A>G         | M166V   | A>G         |
| <b>GNB3</b>    | Chromosom 12p13      | <b>rs5443</b>      | NM_002075.2:c.825C>T         | S275S   | C>T         |
| <b>GSTP1</b>   | Chromosom 11q13.2    | <b>rs1695</b>      | NM_000852.3:c.313A>G         | I105V   | A>G         |
| <b>HLA-A</b>   | Chromosom 6p21.3     | <b>rs1061235</b>   | NM_002116.7:c.*66A>T         | -       | A>T         |
| <b>HLA-A</b>   | Chromosom 6p21.3     | <b>rs1633021</b>   | NC_000006.12:g.29779092T>C   | -       | T>C         |
| <b>HLA-B</b>   | Chromosom 6p21.3     | <b>rs3909184</b>   | NM_005803.2:c.724-507C>G     | -       | C>G         |
| <b>HLA-B</b>   | Chromosom 6p21.3     | <b>rs2395029</b>   | NM_006674.3:c.*568T>G        | -       | T>G         |
| <b>HLA-B</b>   | Chromosom 6p21.3     | <b>rs2844682</b>   | NC_000006.11:g.30946148G>A   | -       | G>A         |
| <b>HMGCR</b>   | Chromosom 5q13.3-q14 | <b>rs17238540</b>  | NM_000859.2:c.2457+117T>G    | -       | T>G         |
| <b>HMGCR</b>   | Chromosom 5q13.3-q14 | <b>rs17244841</b>  | NM_000859.2:c.451-174A>T     | -       | A>T         |
| <b>HTR2A</b>   | Chromosom 13q14-q21  | <b>rs6311</b>      | NC_000013.10:g.47471478C>T   | -       | C>T         |
| <b>HTR2A</b>   | Chromosom 13q14-q21  | <b>rs6313</b>      | NM_000621.3:c.102C>T         | S34S    | C>T         |
| <b>HTR2A</b>   | Chromosom 13q14-q21  | <b>rs7997012</b>   | NM_000621.3:c.614-2211T>C    | -       | T>C         |
| <b>HTR2A</b>   | Chromosom 13q14-q21  | <b>rs9316233</b>   | NC_000013.10:g.47433355C>G   | -       | C>G         |
| <b>HTR2A</b>   | Chromosom 13q14-q21  | <b>rs6314</b>      | NC_000013.10:g.47409034G>A   | H368Y   | G>A         |
| <b>IFNL3</b>   | Chromosom 19q13.13   | <b>rs8099917</b>   | NC_000019.9:g.39743165T>G    | -       | T>G         |

|                |                    |                    |                           |       |     |
|----------------|--------------------|--------------------|---------------------------|-------|-----|
| <b>IFNL3</b>   | Chromosom 19q13.13 | <b>rs12979860</b>  | NC_000019.9:g.39738787C>T | -     | C>T |
| <b>ITPA</b>    | Chromosom 20p      | <b>rs1127354</b>   | NM_181493.1:c.43C>A       | P32T  | C>A |
| <b>MT-RNR1</b> | mitochondriale DNA | <b>rs267606617</b> | NC_012920.1:m.1555A>G     | -     | A>G |
| <b>NAT2</b>    | Chromosom 8p22     | <b>rs1801280</b>   | NM_000015.2:c.341T>C      | I114T | T>C |
| <b>NAT2</b>    | Chromosom 8p22     | <b>rs1799930</b>   | NM_000015.2:c.590G>A      | R197Q | G>A |
| <b>NAT2</b>    | Chromosom 8p22     | <b>rs1799931</b>   | NM_000015.2:c.857G>A      | G286E | G>A |
| <b>OPRM1</b>   | Chromosom 6q24-q25 | <b>rs1799971</b>   | NM_000914.3:c.118A>G      | N40D  | A>G |
| <b>SLC19A1</b> | Chromosom 21q22.3  | <b>rs1051266</b>   | NM_194255.1:c.80A>G       | H27R  | A>G |
| <b>SLCO1B1</b> | Chromosom 12p12    | <b>rs4149056</b>   | NM_006446.4:c.521T>C      | V174A | T>C |
| <b>SLCO1B1</b> | Chromosom 12p12    | <b>rs11045819</b>  | NM_006446.4:c.463C>A      | P155T | C>A |
| <b>SLCO1B1</b> | Chromosom 12p12    | <b>rs2306283</b>   | NM_006446.4:c.388A>G      | N130D | A>G |
| <b>SLCO1B1</b> | Chromosom 12p12    | <b>rs4149015</b>   | NG_011745.1:g.4195G>A     | -     | G>A |
| <b>TPMT</b>    | Chromosom 6p22.3   | <b>rs1800462</b>   | NM_000367.2:c.238G>C      | A80P  | G>C |
| <b>TPMT</b>    | Chromosom 6p22.3   | <b>rs1800460</b>   | NM_000367.2:c.460G>A      | A154T | G>A |
| <b>TPMT</b>    | Chromosom 6p22.3   | <b>rs1142345</b>   | NM_000367.2:c.719A>G      | Y240C | A>G |
| <b>TPMT</b>    | Chromosom 6p22.3   | <b>rs1800584</b>   | NM_000367.2:c.626-1G>A    | -     | G>A |
| <b>TPMT</b>    | Chromosom 6p22.3   | <b>rs12201199</b>  | NM_000367.2:c.419+94T>A   | -     | T>A |
| <b>VKORC1</b>  | Chromosom 16p11.2  | <b>rs9923231</b>   | NC_000016.9:g.31107689C>T | -     | C>T |
| <b>VKORC1</b>  | Chromosom 16p11.2  | <b>rs7294</b>      | NM_024006.4:c.*134G>A     | -     | G>A |
| <b>VKORC1</b>  | Chromosom 16p11.2  | <b>rs17708472</b>  | NM_024006.4:c.173+525C>T  | -     | C>T |
| <b>VKORC1</b>  | Chromosom 16p11.2  | <b>rs2359612</b>   | NM_024006.4:c.283+837T>C  | -     | T>C |
| <b>VKORC1</b>  | Chromosom 16p11.2  | <b>rs8050894</b>   | NM_024006.4:c.283+124G>C  | -     | G>C |
| <b>VKORC1</b>  | Chromosom 16p11.2  | <b>rs9934438</b>   | NM_024006.4:c.174-136C>T  | -     | C>T |
